# Supplementary material for: Functionalized Graphene Oxide Modified Polyethersulfone Membranes for Low-Pressure Anionic Dye/Salt Fractionation
Source: MDPI journal article supplement (doi:10.3390/polym10070795), 2018-07-19
Supplement: s1 [file s1]

## Supplementary materials

Article

# Functionalized Graphene Oxide Modified Polyethersulfone Membranes for Low-Pressure Anionic Dye/Salt Fractionation

Lifen Liu <sup>1</sup>, Xin Xie <sup>1</sup>, Rahul S. Zambare <sup>2</sup>, Antony Prince James Selvaraj <sup>2,\*</sup>, Bhuvana NIL Sowrirajalu <sup>2</sup>, Xiaoxiao Song <sup>1,\*</sup>, Chuyang Y. Tang <sup>3</sup> and Congjie Gao <sup>1</sup>

<sup>1</sup> Centre for Membrane and Water Science & Technology, Ocean College, Zhejiang University of Technology, Hangzhou, 310014, China; [lifenliu@zjut.edu.cn](mailto:lifenliu@zjut.edu.cn) (L.L.); [2111601112@zjut.edu.cn](mailto:2111601112@zjut.edu.cn) (X.X.); [gaojc@zjut.edu.cn](mailto:gaojc@zjut.edu.cn) (C.G.)

<sup>2</sup> Environmental and Water Technology Centre of Innovation (EWTCOI), Ngee Ann Polytechnic, 599489, Singapore; [rahul22288@gmail.com](mailto:rahul22288@gmail.com) (R.S.Z.); [bso2@np.edu.sg](mailto:bso2@np.edu.sg) (B.N.S.)

<sup>3</sup> The University of Hong Kong, Department of Civil Engineering, Pokfulam, Hong Kong; [tangc@hku.hk](mailto:tangc@hku.hk)

\* Correspondence: [songxiaoxiao@zjut.edu.cn](mailto:songxiaoxiao@zjut.edu.cn) (X.S.); [jap2@np.edu.sg](mailto:jap2@np.edu.sg) (A.P.J.S.); Tel.: +86-571-88324135 (X.S.)

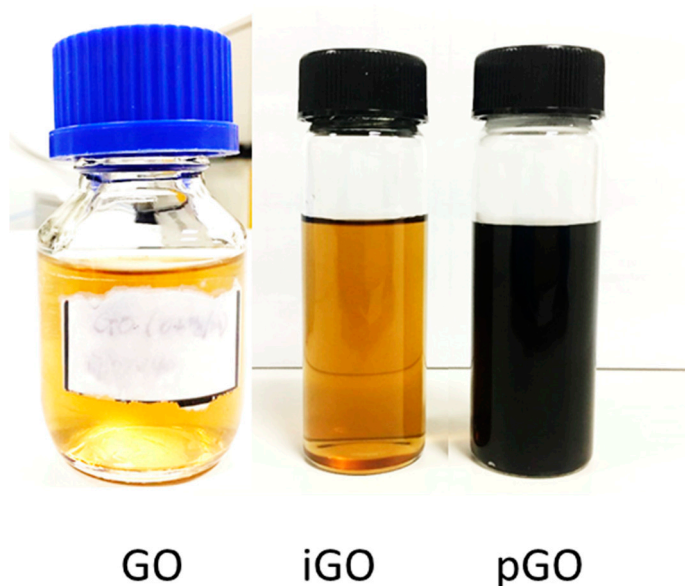

**Figure S1.** The as synthesized GO, iGO and, pGO aqueous solution.

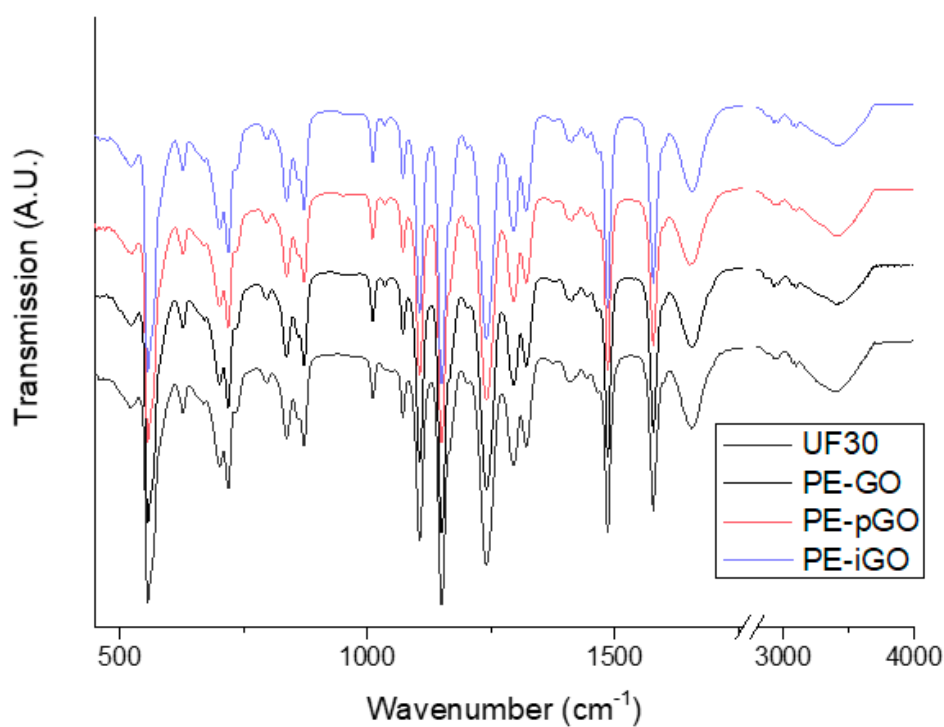

**Figure S2.** The ATR-FTIR absorption bands for UF30, PE-pGO membranes, and PE-iGO membranes.

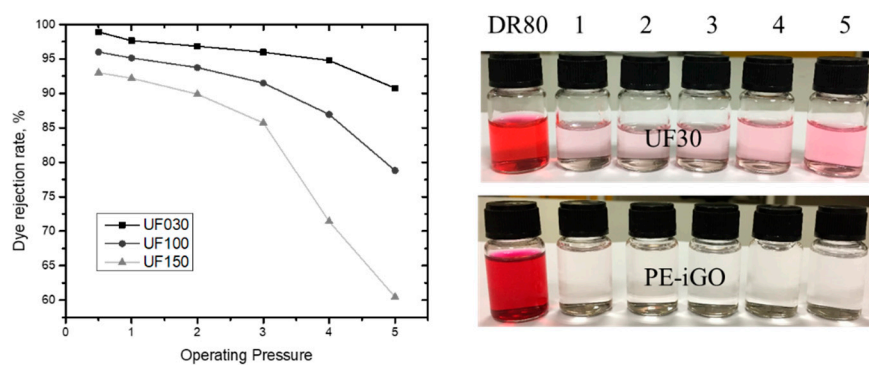

**Figure S3.** (a) The impact of operating pressure on DR80 rejection for commercial UF030, UF100, UF150 membranes (Microdyn Nadir). (b) Photos of filtrates by UF30 and PE-iGO at different pressure (1, 2, 3, 4, 5 bar).
